# Supplementary material for: A systematic review of prevention interventions to reduce prenatal alcohol exposure and fetal alcohol spectrum disorder in indigenous communities
Source: Springer Nature journal article supplement (doi:10.1186/s12889-018-6139-5), 2018-11-03
Supplement: MOESM1 [file 16249102]

## Additional File 1: Complete Search Strategies for each Database

| Database                                     | Search Strategy                                                                                                                                                                                                                                                                                                                                                                                                                                                                                                                                                                                                                                                                                                                                                                                                                                                                                                                                                                                                                                                                                                                                                                                                                                                                                                                                                                                                                                                                                                                                                                                                                                                                                                                                                                                                                                                                                                                                                                                                                                                                                                                |
|----------------------------------------------|--------------------------------------------------------------------------------------------------------------------------------------------------------------------------------------------------------------------------------------------------------------------------------------------------------------------------------------------------------------------------------------------------------------------------------------------------------------------------------------------------------------------------------------------------------------------------------------------------------------------------------------------------------------------------------------------------------------------------------------------------------------------------------------------------------------------------------------------------------------------------------------------------------------------------------------------------------------------------------------------------------------------------------------------------------------------------------------------------------------------------------------------------------------------------------------------------------------------------------------------------------------------------------------------------------------------------------------------------------------------------------------------------------------------------------------------------------------------------------------------------------------------------------------------------------------------------------------------------------------------------------------------------------------------------------------------------------------------------------------------------------------------------------------------------------------------------------------------------------------------------------------------------------------------------------------------------------------------------------------------------------------------------------------------------------------------------------------------------------------------------------|
| Cochrane Database of Systematic Review       | f?etal alcohol in Title, Abstract or Keywords or (alcohol * or ethanol) AND (pregnan * OR fetus OR fetal OR prenatal OR in utero OR intrauterine) in Title, Abstract or Keywords                                                                                                                                                                                                                                                                                                                                                                                                                                                                                                                                                                                                                                                                                                                                                                                                                                                                                                                                                                                                                                                                                                                                                                                                                                                                                                                                                                                                                                                                                                                                                                                                                                                                                                                                                                                                                                                                                                                                               |
| MEDLINE (OVID Interface) includes in process | <ol style="list-style-type: none"> <li>1. Fetal Alcohol Spectrum Disorders/</li> <li>2. f?etal alcohol.tw.</li> <li>3. ((alcohol* or ethanol) adj3 (birth defects or congenital malformations or neurodevelopmental)).mp.</li> <li>4. fasd.tw.</li> <li>5. fae.tw.</li> <li>6. arnd.tw.</li> <li>7. arbd.tw.</li> <li>8. 1 or 2 or 3 or 4 or 5 or 6 or 7</li> <li>9. Alcoholism/</li> <li>10. Alcoholic Intoxication/</li> <li>11. Alcohol-Induced Disorders/</li> <li>12. Alcohol-Related Disorders/</li> <li>13. Substance-Related Disorders/ and (alcohol* or ethanol).tw.</li> <li>14. exp Alcoholic Beverages/</li> <li>15. Alcohol Drinking/</li> <li>16. Ethanol/</li> <li>17. 9 or 10 or 11 or 12 or 13 or 14 or 15 or 16</li> <li>18. fetus/</li> <li>19. pregnancy/</li> <li>20. pregnancy, high-risk/</li> <li>21. exp pregnancy outcome/</li> <li>22. prenatal injuries/</li> <li>23. prenatal exposure delayed effects/</li> <li>24. pregnancy complications/</li> <li>25. maternal exposure/</li> <li>26. 18 or 19 or 20 or 21 or 22 or 23 or 24 or 25</li> <li>27. 17 and 26</li> </ol> <p>The following two searches were not used:<br/>           ((alcohol * or ethanol or (drinking not drinking water))<br/>           and (pregnan * or fetus or fetal or prenatal or in utero<br/>           or intrauterine)).tw.<br/>           limit 28 to ( “ in data review ” or in process or “ pubmed<br/>           not medline ” )</p> <ol style="list-style-type: none"> <li>28. 8 or 27</li> <li>29. Fetal Alcohol Syndrome/pc</li> <li>30. Preventive Health Services/</li> <li>31. primary prevention/</li> <li>32. secondary prevention/</li> <li>33. tertiary prevention/</li> <li>34. public policy/</li> <li>35. health policy/</li> <li>36. house calls/</li> <li>37. risk reduction behavior/</li> <li>38. prevent*.tw.</li> <li>39. ((reduc* or lower or decrease* or smaller) adj3 risk*).tw.</li> <li>40. protect*.tw.</li> <li>41. best practice*.tw.</li> <li>42. exp Communications Media/</li> <li>43. Social Marketing/</li> <li>44. Product Labeling/</li> <li>45. campaign\$.mp.</li> </ol> |

|                         |                                                                                                                                                                                                                                                                                                                                                                                                                                                                                                                                                                                                                                                                                                                                                                                                                                                                                                                                                                                                                                                                                    |
|-------------------------|------------------------------------------------------------------------------------------------------------------------------------------------------------------------------------------------------------------------------------------------------------------------------------------------------------------------------------------------------------------------------------------------------------------------------------------------------------------------------------------------------------------------------------------------------------------------------------------------------------------------------------------------------------------------------------------------------------------------------------------------------------------------------------------------------------------------------------------------------------------------------------------------------------------------------------------------------------------------------------------------------------------------------------------------------------------------------------|
|                         | <p>46. counseling/<br/> 47. government programs/<br/> 48. Community Health Services/<br/> 49. health promotion/<br/> 50. exp Health education/<br/> 51. Social Control Policies/<br/> 52. Prenatal Care/ and ((intervention* or trial).ti. or ((reduc* or lower) adj3 (alcohol or drinking or substance)).tw.)<br/> 53. program evaluation/<br/> 54. 30 or 31 or 32 or 33 or 34 or 35 or 36 or 37 or 38 or 39 or 40 or 41 or 42 or 43 or 44 or 45 or 46 or 47 or 48 or 49 or 50 or 51 or 52 or 53<br/> 55. (28 and 54) or 29<br/> 56. limit 55 to animals<br/> 57. 55 not 56<br/> 58. limit 57 to english language<br/> 59. exp Oceanic Ancestry Group/<br/> 60. exp American Native Continental Ancestry Group/<br/> 61. Population Groups/<br/> 62. (Aborig* or Indig*).mp. [mp=title, abstract, original title, name of substance word, subject heading word, floating sub-heading word, keyword heading word, protocol supplementary concept word, rare disease supplementary concept word, unique identifier, synonyms]<br/> 63. 59 or 60 or 61 or 62<br/> 64. 58 and 63</p>  |
| Embase (OVID Interface) | <p>1. exp Fetal Alcohol Syndrome/<br/> 2. fetal alcohol.tw.<br/> 3. (alcohol* adj3 (birth defects or congenital malformations or neurodevelopmental)).tw.<br/> 4. (alcohol* adj4 prenatal).tw.<br/> 5. (fasd or fae or arbd or arnd).tw.<br/> 6. 1 or 2 or 3 or 4 or 5<br/> 7. alcohol/<br/> 8. alcoholism/<br/> 9. alcohol abuse/<br/> 10. alcohol drinking patterns/<br/> 11. alcohol intoxication/<br/> 12. exp alcoholic beverages/<br/> 13. alcohol consumption/<br/> 14. drinking patterns/<br/> 15. 7 or 8 or 9 or 10 or 11 or 12 or 13 or 14<br/> 16. pregnancy/<br/> 17. fetus/<br/> 18. prenatal exposure/<br/> 19. 16 or 17 or 18<br/> 20. 15 and 19<br/> 21. 6 or 20<br/> 22. Fetal Alcohol Syndrome/pc<br/> 23. "prevention and control"/<br/> 24. protection/<br/> 25. primary prevention/<br/> 26. secondary prevention/<br/> 27. tertiary prevention.mp.<br/> 28. health education/<br/> 29. prevention/<br/> 30. health promotion/<br/> 31. policy/<br/> 32. social marketing/<br/> 33. health care policy/<br/> 34. health program/<br/> 35. harm reduction/</p> |

|                                |                                                                                                                                                                                                                                                                                                                                                                                                                                                                                                                                                                                                                                                                                                                                                                                                                                                                                                                                                                                                                                            |
|--------------------------------|--------------------------------------------------------------------------------------------------------------------------------------------------------------------------------------------------------------------------------------------------------------------------------------------------------------------------------------------------------------------------------------------------------------------------------------------------------------------------------------------------------------------------------------------------------------------------------------------------------------------------------------------------------------------------------------------------------------------------------------------------------------------------------------------------------------------------------------------------------------------------------------------------------------------------------------------------------------------------------------------------------------------------------------------|
|                                | <p>36. risk reduction/<br/> 37. best practice*.tw.<br/> 38. ((reduc* or lower or decrease* or smaller) adj3 risk*).tw.<br/> 39. prenatal care/<br/> 40. 23 or 24 or 25 or 26 or 27 or 28 or 29 or 30 or 31 or 32 or 33 or 34 or 35 or 36 or 37 or 38 or 39<br/> 41. (21 and 40) or 22<br/> 42. limit 41 to english language<br/> 43. (exp vertebrate/ or animal/ or experimental animal/ or nonhuman/ or animal.hw.) not exp human/<br/> 44. 42 not 43<br/> 45. exp Indigenous people/<br/> 46. exp Oceanic ancestry group/<br/> 47. exp American Indian/<br/> 48. exp eskimo/<br/> 49. exp "Maori (people)"/<br/> 50. (Aborig* or Indig*).mp. [mp=title, abstract, heading word, drug trade name, original title, device manufacturer, drug manufacturer, device trade name, keyword, floating subheading word]<br/> 51. 45 or 46 or 47 or 48 or 49 or 50<br/> 52. 44 and 51</p>                                                                                                                                                          |
| CINAHL Plus (Ebsco Interface)  | <p>S1: fetal alcohol<br/> S2: ((MH " Alcoholic Intoxication " ) or (MH " Alcohol Abuse " ) or (MH " Alcohol Drinking " ) or (MH " Alcoholic Beverages + " ) or (MH " Alcoholism " ) ) and ( (MH " Fetus " ) or (MH " Pregnancy " ) or Prenatal)<br/> S3: S1 OR S2<br/> S4: (MH " Fetal Alcohol Syndrome/PC " )<br/> S5: prevent * or protect * or policy or policies or education or program or health promotion or marketing or best practice * or identifying or identification<br/> S6: (S3 AND S5) OR S4<br/> S7: Aborig* OR Indig*<br/> S8: (MM "Aborigines+") OR (MM "Native Americans") OR (MM "Maori") OR (MM "Indigenous Peoples") OR (MM "Eskimos")<br/> Limiters - Language: English<br/> S9 S7 OR S8<br/> S10 S6 AND S9</p>                                                                                                                                                                                                                                                                                                    |
| Web of Science (ISI Interface) | <p>#1: TI=((fetal alcohol ) OR ((pregnan* OR fetus OR prenatal) AND alcohol*)) AND TS=(screening or prevent* or protect* or policy or policies or education or program or health promotion or marketing or identifying OR identification or label*)<br/> #2: TS = ((fetal alcohol) OR ((pregnan* OR fetus OR prenatal) AND alcohol*)) AND TI = (screening or prevent* or protect* or policy or policies or education or program or health promotion or marketing or identifying OR identification or label*)<br/> #3: #1 OR #2 AND LANGUAGE: (English)<br/> #4: TS = (mouse OR mice OR murine OR rat OR rats OR pig OR pigs OR porcine OR sheep) AND LANGUAGE: (English)<br/> #5: #3 NOT #4 AND LANGUAGE: (English)<br/> #6: TOPIC: (Aborig*)<br/> #7: TS= (Aboriginal* OR Indig* OR (First Nation*) OR Native OR (American NEAR/2 Indian) OR Eskimo OR Inuit OR Maori)<br/> #8: TI=(Aboriginal* OR Indig* OR (First Nation*) OR Native OR (American NEAR/2 Indian) OR Eskimo OR Inuit OR Maori)<br/> #9: #8 OR #7<br/> #10: #9 AND #5</p> |
| PsycINFO (Ovid Interface)      | <p>1. exp Fetal Alcohol Syndrome/<br/> 2. fetal alcohol.tw.<br/> 3. (alcohol* adj3 (birth defects or congenital malformations)).tw.</p>                                                                                                                                                                                                                                                                                                                                                                                                                                                                                                                                                                                                                                                                                                                                                                                                                                                                                                    |

|          |                                                                                                                                                                                                                                                                                                                                                                                                                                                                                                                                                                                                                                                                                                                                                                                                                                                                                                                                                                                                                                                                                                                                                                                                                                                                                                                   |
|----------|-------------------------------------------------------------------------------------------------------------------------------------------------------------------------------------------------------------------------------------------------------------------------------------------------------------------------------------------------------------------------------------------------------------------------------------------------------------------------------------------------------------------------------------------------------------------------------------------------------------------------------------------------------------------------------------------------------------------------------------------------------------------------------------------------------------------------------------------------------------------------------------------------------------------------------------------------------------------------------------------------------------------------------------------------------------------------------------------------------------------------------------------------------------------------------------------------------------------------------------------------------------------------------------------------------------------|
|          | <p>4. fasd.tw.<br/> 5. fae.tw.<br/> 6. arbd.tw.<br/> 7. arnd.tw.<br/> 8. (alcohol adj3 neurodevelopmental).tw.<br/> 9. 1 or 2 or 3 or 4 or 5 or 6 or 7 or 8<br/> 10. alcoholism/ or alcohol abuse/ or alcohol drinking patterns/ or alcohol intoxication/<br/> 11. exp alcoholic beverages/<br/> 12. 10 or 11<br/> 13. pregnancy/<br/> 14. fetus/<br/> 15. prenatal exposure/<br/> 16. 13 or 14 or 15<br/> 17. 12 and 16<br/> 18. health education/<br/> 19. prevention/<br/> 20. health promotion/<br/> 21. social marketing/<br/> 22. health screening/<br/> 23. screening/<br/> 24. risk management/ or risk assessment/<br/> 25. ((reduc* or lower or decrease* or smaller) adj3 risk*).tw.<br/> 26. prevent*.tw.<br/> 27. health care policy/ or policy making/ or government policy making/<br/> 28. protect*.tw.<br/> 29. 18 or 19 or 20 or 21 or 22 or 23 or 24 or 25 or 26 or 27 or 28<br/> 30. (9 or 17) and 29<br/> 31. limit 30 to english language<br/> 32. limit 31 to animal<br/> 33. 31 not 32<br/> 34. exp Indigenous Populations/<br/> 35. exp American Indians/<br/> 36. 34 or 35<br/> 37. 33 and 36<br/> 38. (Aborig* or Indig*).mp. [mp=title, abstract, heading word, table of contents, key concepts, original title, tests &amp; measures]<br/> 39. 34 or 35 or 38<br/> 40. 33 and 39</p> |
| SocINDEX | <p>S1: fetal alcohol OR fetal alcohol<br/> S2: DE "Alcoholism" or DE "Alcoholic Beverages" or DE "Alcoholics" or DE "Drinking of alcoholic beverages"<br/> S3: DE "Pregnancy" or DE "Pregnant women" or DE "Teenage pregnancy"<br/> S4: S1 OR (S2 AND S3)<br/> S5: prevent* or protect* or policy or policies or education or program or health promotion or marketing or best practice or identifying or identification<br/> S6: S4 AND S5<br/> S7: Aborig* OR Indig*<br/> S8: (MM "Aborigines+") OR (MM "Native Americans") OR (MM "Maori") OR (MM "Indigenous Peoples") OR (MM "Eskimos")<br/> Limiters - Language: English<br/> S9: S7 OR S8<br/> S10: S6 AND S9</p>                                                                                                                                                                                                                                                                                                                                                                                                                                                                                                                                                                                                                                          |
| Informit | <p>((F?etal alcohol) OR (Alcohol* AND (pregnan* OR *natal OR mother* OR maternal))) AND (Prevent* OR Intervention* OR (Health Promotion) OR (Health Education) OR (Health Communication) OR (Health Plan*) OR (Harm Reduction) OR Treatment* OR Therap* OR Support OR</p>                                                                                                                                                                                                                                                                                                                                                                                                                                                                                                                                                                                                                                                                                                                                                                                                                                                                                                                                                                                                                                         |

|  |                                                                                                                                      |
|--|--------------------------------------------------------------------------------------------------------------------------------------|
|  | Rehab* OR Intervention OR Reduc* OR Abstinence OR Motivation* OR<br>Temperance OR (Alcoholics Anonymous))) AND (Aborigin* OR Indig*) |
|--|--------------------------------------------------------------------------------------------------------------------------------------|
